# Supplementary material
Source: PubMed Central journal article supplement (PMC4417003)
Supplement: NIHMS665512-supplement-Supplemental_Digital_Content_1.pdf [file NIHMS665512-supplement-Supplemental_Digital_Content_1.pdf]

## Supplemental Digital Content 1

| Code  | Variable                                      | Included conditions                                                                                                                                                                                                                                                                                                                                                                                                                                                                                                                                | ICD-9 / E-code                                                                                                | Reason For Visit                                                                                  |
|-------|-----------------------------------------------|----------------------------------------------------------------------------------------------------------------------------------------------------------------------------------------------------------------------------------------------------------------------------------------------------------------------------------------------------------------------------------------------------------------------------------------------------------------------------------------------------------------------------------------------------|---------------------------------------------------------------------------------------------------------------|---------------------------------------------------------------------------------------------------|
| sub   | Substance Abuse or Dependence                 | Abuse, dependence, and diagnoses of substance-induced psychiatric symptoms.                                                                                                                                                                                                                                                                                                                                                                                                                                                                        | 291.0-292.99, 303.0-305.09, 305.2-305.99, 980.0-980.99                                                        | 1145.0, 1150.0, 2320.0, 2321.0, 5910.0, 5915.0                                                    |
| alcab | Alcohol                                       | Abuse, dependence, and diagnoses of substance-induced psychiatric symptoms.                                                                                                                                                                                                                                                                                                                                                                                                                                                                        | 291.0-291.99, 303.0-303.99, 305.0-305.09, 980.0-980.99                                                        | 1145.0, 2320.0, 5915.0,                                                                           |
| drgab | Illicit Drugs                                 | Abuse, dependence, and diagnoses of substance-induced psychiatric symptoms.                                                                                                                                                                                                                                                                                                                                                                                                                                                                        | 292.0-292.99, 304.0-304.99, 305.2-305.99                                                                      | 1150.0, 2321.0, 5910.0                                                                            |
| opi   | Opioid/<br>Sedative/Hypnotic/Anxiolytic       | Abuse or dependence                                                                                                                                                                                                                                                                                                                                                                                                                                                                                                                                | 304.0-304.09, 305.5-305.59, 304.1-304.19, 305.4-305.49                                                        |                                                                                                   |
| coc   | Cocaine/Amphetamine/Stimulant/Sympathomimetic | Abuse or dependence                                                                                                                                                                                                                                                                                                                                                                                                                                                                                                                                | 304.2-304.29, 304.4-304.49, 305.6-305.79                                                                      |                                                                                                   |
| can   | Cannabis/Hallucinogen                         | Abuse or dependence                                                                                                                                                                                                                                                                                                                                                                                                                                                                                                                                | 304.3-304.39, 304.5-304.59, 305.20-305.39                                                                     |                                                                                                   |
| ouc   | Other/Unspecified/Combined                    | Abuse or dependence                                                                                                                                                                                                                                                                                                                                                                                                                                                                                                                                | 304.6-304.99, 305.9-305.99                                                                                    |                                                                                                   |
| ment  | All Mental Health Visits                      | We defined mental health conditions as the presence of schizophrenic disorders, mood disorders, delusional disorders, nonorganic psychoses, psychoses specific to childhood, neurotic disorders, personality disorders, acute reaction to stress, adjustment reaction, depressive disorders, disturbances of conduct, disturbances of emotions specific to childhood and adolescence, dementias, transient or persistent mental disorders, hyperkinetic syndromes of childhood, suicide, or other <i>ICD-9</i> diagnoses related to mental health. | 290.0-290.99, 293.0-301.99, 307.0-307.39, 307.5-307.59, 307.8-307.89, 308.0-309.99, 311.0-314.99, e9950-e9959 | *1100.0-1134.9, 1155.0-1159.0, 1165.0, 1166.0-1199.9, 2300.0-2319.9, 2330.0-2349.9, 5818.0-5820.9 |
| adj   | Adjustment Disorders                          |                                                                                                                                                                                                                                                                                                                                                                                                                                                                                                                                                    | 309.0-309.20, 309.22-309.80, 309.82-309.99                                                                    |                                                                                                   |

|       |                               |                                                                                                                                                                                                                                                                                                                                                                                                                                                                     |                                                                                                                                                                                                                                                        |                       |
|-------|-------------------------------|---------------------------------------------------------------------------------------------------------------------------------------------------------------------------------------------------------------------------------------------------------------------------------------------------------------------------------------------------------------------------------------------------------------------------------------------------------------------|--------------------------------------------------------------------------------------------------------------------------------------------------------------------------------------------------------------------------------------------------------|-----------------------|
| anx   | Anxiety Disorders             | Panic disorders, generalized anxiety disorders, phobias, obsessive compulsive disorders, and post-traumatic stress disorders),                                                                                                                                                                                                                                                                                                                                      | 300.0-300.09, 300.2-300.39, 308.0-308.99, 309.81, 309.21                                                                                                                                                                                               | *1100.0,1105.0,1130.5 |
| bip   | Manic/Hypomanic Disorders     | Bipolar disorders and manic or hypomanic disorders                                                                                                                                                                                                                                                                                                                                                                                                                  | 296.0-296.19, 296.4-296.81, 296.89, 301.11, 301.13                                                                                                                                                                                                     |                       |
| cdi   | Disruptive Behavior Disorders | Conduct disorders, disorders of impulse control, and attention deficit disorders                                                                                                                                                                                                                                                                                                                                                                                    | 312.0-312.49, 312.80-312.99, 313.81, 314.00-314.99                                                                                                                                                                                                     | *1130.0,1125.0        |
| depr  | Depressive Disorders          | Nonpsychotic major depression and atypical depression                                                                                                                                                                                                                                                                                                                                                                                                               | 296.2-296.23, 296.25-296.39, 296.82, 300.4, 301.12, 313.1-313.19                                                                                                                                                                                       | *1110.0               |
| hdp   | Psychotic Disorders           | Dementias, schizophrenia, and autistic disorders                                                                                                                                                                                                                                                                                                                                                                                                                    | 290.0-290.99, 293.0-295.99, 296.24, 296.34, 297.0-299.99                                                                                                                                                                                               | *1155.0               |
| suic  | Suicide/Self-harm             | Intentional self-inflicted injury, suicide attempt, or intentional overdose.                                                                                                                                                                                                                                                                                                                                                                                        | e9950-e9959                                                                                                                                                                                                                                            | 5818.0, 5820.0,5820.1 |
| op    | Other Psychiatric Disorders   | Mental health visits not included in aforementioned subcategories                                                                                                                                                                                                                                                                                                                                                                                                   | Determined by taking Mental Health Component codes without including codes found in adjustment disorders, anxiety disorders, manic/hypomanic disorders, disruptive behavior disorders, depressive disorders, psychotic disorders, suicide/ self-harm . |                       |
| alldu | Dual Diagnosis                | Any visit that included both mental health and substance use in any number of combinations of the 3 reason for visit codes, <i>ICD-9</i> diagnoses, or <i>ICD-9</i> E-codes. For example, dual diagnosis may be represented by any qualifying substance use reason for visit and any qualifying mental health <i>ICD-9</i> diagnosis. Alternatively, mental health may be coded as a primary <i>ICD-9</i> diagnosis and substance use as a secondary, or vice versa | Substance Abuse or Dependence and Mental Health Component co-occurring for visit                                                                                                                                                                       |                       |

\*In creating a variable for "mental health reasons for visits (RFV)" to incorporate into the "All Mental Health Visits" variable, we excluded visits with any substance abuse component (except in the case of suicide/self-harm), because substance use confounds mental health symptoms. However, the same visits might still be included in the "All Mental Health Visits" variable if they were to contain mental health ICD-9 diagnosis, rather than RFV, codes. We also excluded visits for sexual and gender identity disorders, developmental delays, psychic factors associated with diseases classified elsewhere, and intellectual disabilities from our "All Mental Health Visits" variable.
