# Supplementary material
Source: PubMed Central journal article supplement (PMC4417003)
Supplement: NIHMS665512-supplement-Supplemental_Digital_Content_2.pdf [file NIHMS665512-supplement-Supplemental_Digital_Content_2.pdf]

**Supplemental Digital Content 2.** Patient demographic and hospital characteristics of adolescent patients presenting to US Emergency Departments with substance use and mental health conditions as the primary diagnosis/reason, 1997-2010.

| Characteristics   | Primary Substance Use Visit<br>n = 1366 |                     | Primary Mental Health Visit<br>n = 3831 |                     |
|-------------------|-----------------------------------------|---------------------|-----------------------------------------|---------------------|
|                   | Unweighted number of visits (n)         | Weighted % (95% CI) | Unweighted number of visits (n)         | Weighted % (95% CI) |
| Age Category      |                                         |                     |                                         |                     |
| 11-13 years       | 29                                      | 3.2 (1.4-4.9)       | 400                                     | 10.4 (8.8-11.9)     |
| 14-18 years       | 501                                     | 38.8 (35.3-42.2)    | 1460                                    | 38.9 (36.4-41.4)    |
| 19-24 years       | 836                                     | 58.1 (54.5-61.6)    | 1971                                    | 50.8 (48.2-53.3)    |
| Sex               |                                         |                     |                                         |                     |
| Female            | 566                                     | 43.9 (40.3-47.5)    | 1990                                    | 52.8 (50.4-55.1)    |
| Male              | 800                                     | 56.1 (52.5-59.7)    | 1841                                    | 47.2 (44.9-49.6)    |
| Race/Ethnicity    |                                         |                     |                                         |                     |
| White             | 839                                     | 67.1 (63.2-71.0)    | 1986                                    | 66.2 (63.3-69.1)    |
| Black             | 186                                     | 15.0 (12.2-17.9)    | 860                                     | 19.8 (17.5-22.1)    |
| Hispanic          | 227                                     | 14.6 (11.4-17.8)    | 651                                     | 11.4 (9.7-13.2)     |
| Other             | 50                                      | 3.3 (2.0-4.5)       | 153                                     | 2.6 (1.8-3.4)       |
| Insurance         |                                         |                     |                                         |                     |
| Private           | 484                                     | 35.7 (31.8-39.6)    | 1163                                    | 33.9 (31.5-36.2)    |
| Medicare          | 6                                       | 0.2 (0-0.5)         | 90                                      | 2.5 (1.6-3.3)       |
| Medicaid          | 263                                     | 19.8 (16.2-23.3)    | 1367                                    | 33.4 (30.8-35.9)    |
| Uninsured         | 405                                     | 29.7 (26.3-33.1)    | 761                                     | 20.6 (18.7-22.6)    |
| Other             | 206                                     | 14.6 (12.1-17.2)    | 436                                     | 9.7 (8.3-11.1)      |
| Setting           |                                         |                     |                                         |                     |
| Urban             | 1045                                    | 88.9 (83.8-94.0)    | 2878                                    | 84.5 (77.9-91.1)    |
| Rural             | 90                                      | 11.1 (6.0-16.2)     | 309                                     | 15.5 (8.9-22.1)     |
| Region            |                                         |                     |                                         |                     |
| Northeast         | 422                                     | 21.8 (17.6-26.1)    | 1532                                    | 24.0 (19.6-28.4)    |
| Midwest           | 262                                     | 21.4 (17.2-25.7)    | 734                                     | 26.9 (21.8-32.0)    |
| South             | 348                                     | 31.7 (26.6-36.8)    | 961                                     | 32.7 (28.2-37.1)    |
| West              | 334                                     | 25.0 (20.1-30.0)    | 604                                     | 16.4 (13.1-19.8)    |
| Ambulance Arrival | 467                                     | 43.9 (40.1-47.7)    | 830                                     | 26.2 (23.7-28.6)    |
| Weekend           | 503                                     | 37.0 (33.2-40.8)    | 913                                     | 25.5 (23.6-27.3)    |
| Shift*            |                                         |                     |                                         |                     |
| Day               | 283                                     | 19.7 (16.0-22.5)    | 1203                                    | 29.8 (27.6-32.1)    |
| Swing             | 527                                     | 39.3 (35.6-42.9)    | 1811                                    | 49.4 (47.1-51.7)    |
| Night             | 529                                     | 41.0 (37.3-44.8)    | 726                                     | 20.8 (18.8-22.7)    |

\*Day: 7a-3p; Swing: 3p-11p; Night: 11p-7a
